# Supplementary material for: Synthesis, crystal structure, and physical properties of the Eu(ii)-based selenide semiconductor: EuHfSe3
Source: Royal Society of Chemistry journal article supplement (doi:10.1039/d4tc01750a), 2024-01-01
Supplement: d4tc01750a1.pdf [file d4tc01750a1.pdf]

## Supporting Information

### Synthesis, Crystal Structure, and Physical Properties of the Eu(II)-Based Selenide Semiconductor: $\text{EuHfSe}_3$

Subhendu Jana,<sup>1</sup> Shaun O'Donnell,<sup>2</sup> Ian A. Leahy,<sup>2</sup> Aylin Koldemir,<sup>3</sup> Rainer Pöttgen,<sup>3</sup> Rebecca W. Smaha,<sup>2</sup> and Paul A. Maggard<sup>1,\*</sup>

<sup>1</sup> Department of Chemistry, North Carolina State University, Raleigh, North Carolina, USA, 27695.

<sup>2</sup> Materials Science Center, National Renewable Energy Laboratory, Golden, Colorado, USA, 80401.

<sup>3</sup> Institut für Anorganische und Analytische Chemie, Universität Münster, Corrensstrasse 30, 48149 Münster, Germany.

\*Corresponding author e-mail: [Paul\\_Maggard@ncsu.edu](mailto:Paul_Maggard@ncsu.edu)

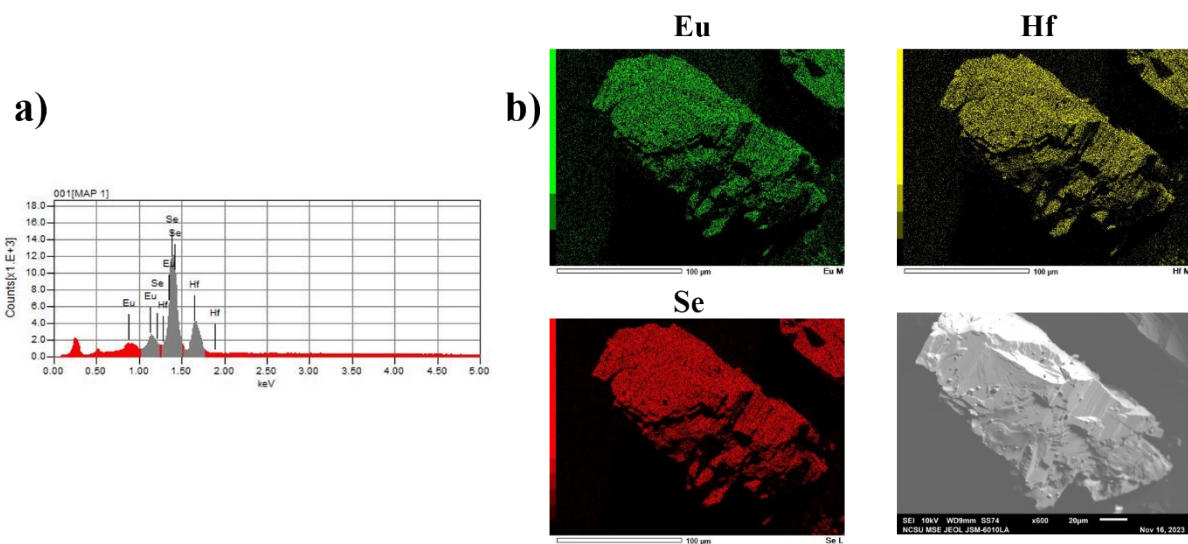

**Figure S1.** (a) EDX analysis and (b) elemental mapping of selected  $\text{EuHfSe}_3$  crystals. The observed elemental percentages of Eu, Hf, and Se are 17.6%, 21.0%, and 61.4%, respectively.

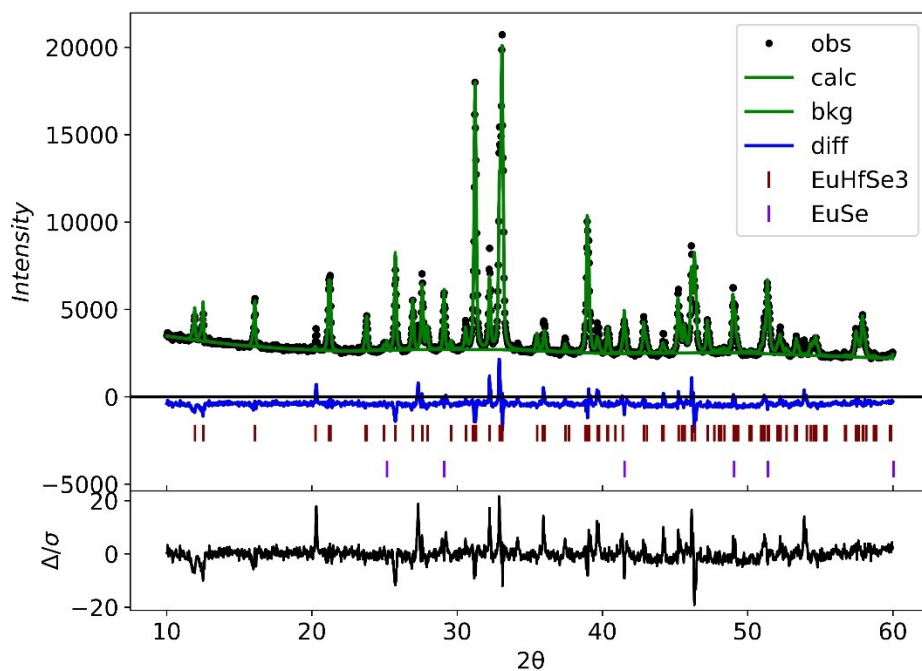

**Figure S2.** Rietveld refinement of powder x-ray diffraction data of  $\text{EuHfSe}_3$  and a  $\text{EuSe}$  secondary phase (wR: 5.231%). The calculated phase fractions were 89.13 wt%  $\text{EuHfSe}_3$  and 10.87 wt%  $\text{EuSe}$ .

**Table S1.** Atomic displacement parameters ( $\text{\AA}^2$ ) for the refined  $\text{EuHfSe}_3$  structure.

| Atom | $U^{11}$    | $U^{22}$    | $U^{33}$  | $U^{12}$ | $U^{13}$     | $U^{23}$ |
|------|-------------|-------------|-----------|----------|--------------|----------|
| Eu1  | 0.0228(2)   | 0.01082(19) | 0.0157(2) | 0.000    | -0.00069(17) | 0.000    |
| Hf1  | 0.01207(18) | 0.00974(17) | 0.0124(2) | 0.000    | 0.00032(12)  | 0.000    |
| Se1  | 0.0107(4)   | 0.0093(3)   | 0.0089(4) | 0.000    | -0.0001(3)   | 0.000    |
| Se2  | 0.0103(4)   | 0.0082(3)   | 0.0141(4) | 0.000    | 0.0019(3)    | 0.000    |
| Se3  | 0.0136(4)   | 0.0109(4)   | 0.0113(4) | 0.000    | 0.0025(3)    | 0.000    |

**Table S2.** Selected metric variables (Å and °) for the refined EuHfSe<sub>3</sub> crystal structure.

|                                           |              |                                             |             |
|-------------------------------------------|--------------|---------------------------------------------|-------------|
| Eu1—Se3 <sup>i</sup>                      | 3.1568 (7)   | Eu1—Eu1 <sup>vii</sup>                      | 3.9300 (4)  |
| Eu1—Se3 <sup>ii</sup>                     | 3.1568 (7)   | Eu1—Eu1 <sup>viii</sup>                     | 3.9300 (4)  |
| Eu1—Se1 <sup>iii</sup>                    | 3.1664 (9)   | Hf1—Se3                                     | 2.5572 (9)  |
| Eu1—Se2 <sup>iv</sup>                     | 3.2053 (8)   | Hf1—Se2 <sup>v</sup>                        | 2.6729 (6)  |
| Eu1—Se2 <sup>v</sup>                      | 3.2053 (8)   | Hf1—Se2 <sup>iv</sup>                       | 2.6729 (6)  |
| Eu1—Se3 <sup>iv</sup>                     | 3.2069 (8)   | Hf1—Se1 <sup>ix</sup>                       | 2.6963 (6)  |
| Eu1—Se3 <sup>v</sup>                      | 3.2069 (7)   | Hf1—Se1 <sup>x</sup>                        | 2.6963 (6)  |
| Eu1—Se2 <sup>vi</sup>                     | 3.3617 (9)   | Hf1—Se1                                     | 2.7214 (9)  |
| Se3 <sup>i</sup> —Eu1—Se3 <sup>ii</sup>   | 76.99 (2)    | Se2 <sup>vi</sup> —Eu1—Eu1 <sup>viii</sup>  | 90.0        |
| Se3 <sup>i</sup> —Eu1—Se1 <sup>iii</sup>  | 69.21 (2)    | Eu1 <sup>vii</sup> —Eu1—Eu1 <sup>viii</sup> | 180.0       |
| Se3 <sup>ii</sup> —Eu1—Se1 <sup>iii</sup> | 69.21 (2)    | Se3—Hf1—Se2 <sup>v</sup>                    | 95.76 (2)   |
| Se3 <sup>i</sup> —Eu1—Se2 <sup>iv</sup>   | 136.69 (2)   | Se3—Hf1—Se2 <sup>iv</sup>                   | 95.76 (2)   |
| Se3 <sup>ii</sup> —Eu1—Se2 <sup>iv</sup>  | 87.963 (18)  | Se2 <sup>v</sup> —Hf1—Se2 <sup>iv</sup>     | 94.64 (3)   |
| Se1 <sup>iii</sup> —Eu1—Se2 <sup>iv</sup> | 141.634 (12) | Se3—Hf1—Se1 <sup>ix</sup>                   | 90.91 (2)   |
| Se3 <sup>i</sup> —Eu1—Se2 <sup>v</sup>    | 87.963 (18)  | Se2 <sup>v</sup> —Hf1—Se1 <sup>ix</sup>     | 173.28 (3)  |
| Se3 <sup>ii</sup> —Eu1—Se2 <sup>v</sup>   | 136.69 (2)   | Se2 <sup>iv</sup> —Hf1—Se1 <sup>ix</sup>    | 85.504 (18) |
| Se1 <sup>iii</sup> —Eu1—Se2 <sup>v</sup>  | 141.634 (12) | Se3—Hf1—Se1 <sup>x</sup>                    | 90.91 (2)   |
| Se2 <sup>iv</sup> —Eu1—Se2 <sup>v</sup>   | 75.62 (2)    | Se2 <sup>v</sup> —Hf1—Se1 <sup>x</sup>      | 85.504 (18) |
| Se3 <sup>i</sup> —Eu1—Se3 <sup>iv</sup>   | 141.159 (16) | Se2 <sup>iv</sup> —Hf1—Se1 <sup>x</sup>     | 173.28 (3)  |
| Se3 <sup>ii</sup> —Eu1—Se3 <sup>iv</sup>  | 90.921 (11)  | Se1 <sup>ix</sup> —Hf1—Se1 <sup>x</sup>     | 93.57 (3)   |
| Se1 <sup>iii</sup> —Eu1—Se3 <sup>iv</sup> | 71.98 (2)    | Se3—Hf1—Se1                                 | 175.67 (3)  |
| Se2 <sup>iv</sup> —Eu1—Se3 <sup>iv</sup>  | 78.243 (19)  | Se2 <sup>v</sup> —Hf1—Se1                   | 87.17 (2)   |
| Se2 <sup>v</sup> —Eu1—Se3 <sup>iv</sup>   | 123.20 (2)   | Se2 <sup>iv</sup> —Hf1—Se1                  | 87.17 (2)   |
| Se3 <sup>i</sup> —Eu1—Se3 <sup>v</sup>    | 90.921 (11)  | Se1 <sup>ix</sup> —Hf1—Se1                  | 86.13 (2)   |
| Se3 <sup>ii</sup> —Eu1—Se3 <sup>v</sup>   | 141.159 (16) | Se1 <sup>x</sup> —Hf1—Se1                   | 86.13 (2)   |
| Se1 <sup>iii</sup> —Eu1—Se3 <sup>v</sup>  | 71.984 (19)  | Hf1 <sup>ix</sup> —Se1—Hf1 <sup>x</sup>     | 93.57 (3)   |
| Se2 <sup>iv</sup> —Eu1—Se3 <sup>v</sup>   | 123.20 (2)   | Hf1 <sup>ix</sup> —Se1—Hf1                  | 93.87 (2)   |
| Se2 <sup>v</sup> —Eu1—Se3 <sup>v</sup>    | 78.243 (19)  | Hf1 <sup>x</sup> —Se1—Hf1                   | 93.87 (2)   |
| Se3 <sup>iv</sup> —Eu1—Se3 <sup>v</sup>   | 75.58 (2)    | Hf1 <sup>ix</sup> —Se1—Eu1 <sup>xi</sup>    | 97.03 (2)   |
| Se3 <sup>i</sup> —Eu1—Se2 <sup>vi</sup>   | 72.98 (2)    | Hf1 <sup>x</sup> —Se1—Eu1 <sup>xi</sup>     | 97.03 (2)   |
| Se3 <sup>ii</sup> —Eu1—Se2 <sup>vi</sup>  | 72.98 (2)    | Hf1—Se1—Eu1 <sup>xi</sup>                   | 164.04 (3)  |

|                                             |              |                                              |              |
|---------------------------------------------|--------------|----------------------------------------------|--------------|
| Se1 <sup>iii</sup> —Eu1—Se2 <sup>vi</sup>   | 131.07 (2)   | Hf1 <sup>xii</sup> —Se2—Hf1 <sup>xiii</sup>  | 94.64 (3)    |
| Se2 <sup>iv</sup> —Eu1—Se2 <sup>vi</sup>    | 63.78 (2)    | Hf1 <sup>xii</sup> —Se2—Eu1 <sup>xii</sup>   | 88.897 (12)  |
| Se2 <sup>v</sup> —Eu1—Se2 <sup>vi</sup>     | 63.78 (2)    | Hf1 <sup>xiii</sup> —Se2—Eu1 <sup>xii</sup>  | 151.90 (3)   |
| Se3 <sup>iv</sup> —Eu1—Se2 <sup>vi</sup>    | 138.718 (13) | Hf1 <sup>xii</sup> —Se2—Eu1 <sup>xiii</sup>  | 151.90 (3)   |
| Se3 <sup>v</sup> —Eu1—Se2 <sup>vi</sup>     | 138.718 (13) | Hf1 <sup>xiii</sup> —Se2—Eu1 <sup>xiii</sup> | 88.897 (12)  |
| Se3 <sup>i</sup> —Eu1—Eu1 <sup>vii</sup>    | 51.504 (11)  | Eu1 <sup>xii</sup> —Se2—Eu1 <sup>xiii</sup>  | 75.62 (2)    |
| Se3 <sup>ii</sup> —Eu1—Eu1 <sup>vii</sup>   | 128.497 (11) | Hf1 <sup>xii</sup> —Se2—Eu1 <sup>xiv</sup>   | 91.58 (2)    |
| Se1 <sup>iii</sup> —Eu1—Eu1 <sup>vii</sup>  | 90.0         | Hf1 <sup>xiii</sup> —Se2—Eu1 <sup>xiv</sup>  | 91.58 (2)    |
| Se2 <sup>iv</sup> —Eu1—Eu1 <sup>vii</sup>   | 127.809 (11) | Eu1 <sup>xii</sup> —Se2—Eu1 <sup>xiv</sup>   | 116.22 (2)   |
| Se2 <sup>v</sup> —Eu1—Eu1 <sup>vii</sup>    | 52.190 (11)  | Eu1 <sup>xiii</sup> —Se2—Eu1 <sup>xiv</sup>  | 116.22 (2)   |
| Se3 <sup>iv</sup> —Eu1—Eu1 <sup>vii</sup>   | 127.788 (11) | Hf1—Se3—Eu1 <sup>i</sup>                     | 98.68 (2)    |
| Se3 <sup>v</sup> —Eu1—Eu1 <sup>vii</sup>    | 52.212 (11)  | Hf1—Se3—Eu1 <sup>ii</sup>                    | 98.68 (2)    |
| Se2 <sup>vi</sup> —Eu1—Eu1 <sup>vii</sup>   | 90.0         | Eu1 <sup>i</sup> —Se3—Eu1 <sup>ii</sup>      | 76.99 (2)    |
| Se3 <sup>i</sup> —Eu1—Eu1 <sup>viii</sup>   | 128.497 (11) | Hf1—Se3—Eu1 <sup>xiii</sup>                  | 98.99 (2)    |
| Se3 <sup>ii</sup> —Eu1—Eu1 <sup>viii</sup>  | 51.504 (11)  | Eu1 <sup>i</sup> —Se3—Eu1 <sup>xiii</sup>    | 162.31 (3)   |
| Se1 <sup>iii</sup> —Eu1—Eu1 <sup>viii</sup> | 90.0         | Eu1 <sup>ii</sup> —Se3—Eu1 <sup>xiii</sup>   | 100.948 (10) |
| Se2 <sup>iv</sup> —Eu1—Eu1 <sup>viii</sup>  | 52.190 (11)  | Hf1—Se3—Eu1 <sup>xii</sup>                   | 98.99 (2)    |
| Se2 <sup>v</sup> —Eu1—Eu1 <sup>viii</sup>   | 127.809 (11) | Eu1 <sup>i</sup> —Se3—Eu1 <sup>xii</sup>     | 100.948 (10) |
| Se3 <sup>iv</sup> —Eu1—Eu1 <sup>viii</sup>  | 52.212 (11)  | Eu1 <sup>ii</sup> —Se3—Eu1 <sup>xii</sup>    | 162.31 (3)   |
| Se3 <sup>v</sup> —Eu1—Eu1 <sup>viii</sup>   | 127.788 (11) | Eu1 <sup>xiii</sup> —Se3—Eu1 <sup>xii</sup>  | 75.58 (2)    |

Symmetry codes: (i)  $-x+1, -y+1, -z+1$ ; (ii)  $-x+1, -y, -z+1$ ; (iii)  $x+1/2, -y+1/2, -z+3/2$ ; (iv)  $x+1/2, y-1/2, z+1/2$ ; (v)  $-x+1/2, y+1/2, z+1/2$ ; (vi)  $x+1/2, -y+1/2, -z+1/2$ ; (vii)  $x, y+1, z$ ; (viii)  $x, y-1, z$ ; (ix)  $-x, -y, -z+1$ ; (x)  $-x, -y+1, -z+1$ ; (xi)  $x-1/2, -y+1/2, -z+3/2$ ; (xii)  $-x+1/2, y+1/2, z-1/2$ ; (xiii)  $-x+1/2, y-1/2, z-1/2$ ; (xiv)  $x-1/2, -y+1/2, -z+1/2$ .

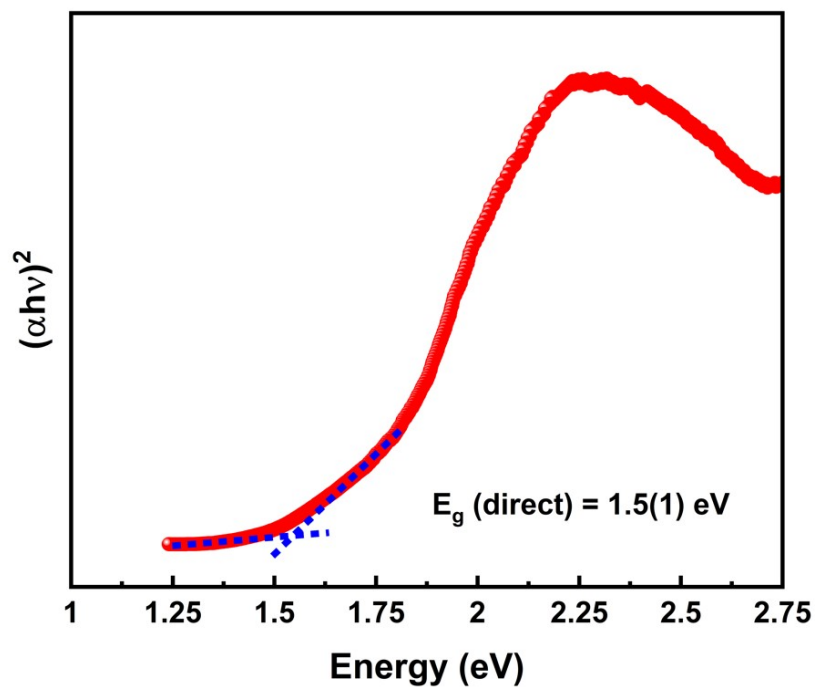

**Figure S3.** Plot of the UV-Vis diffuse reflectance spectrum of the polycrystalline  $\text{EuHfSe}_3$  powder.

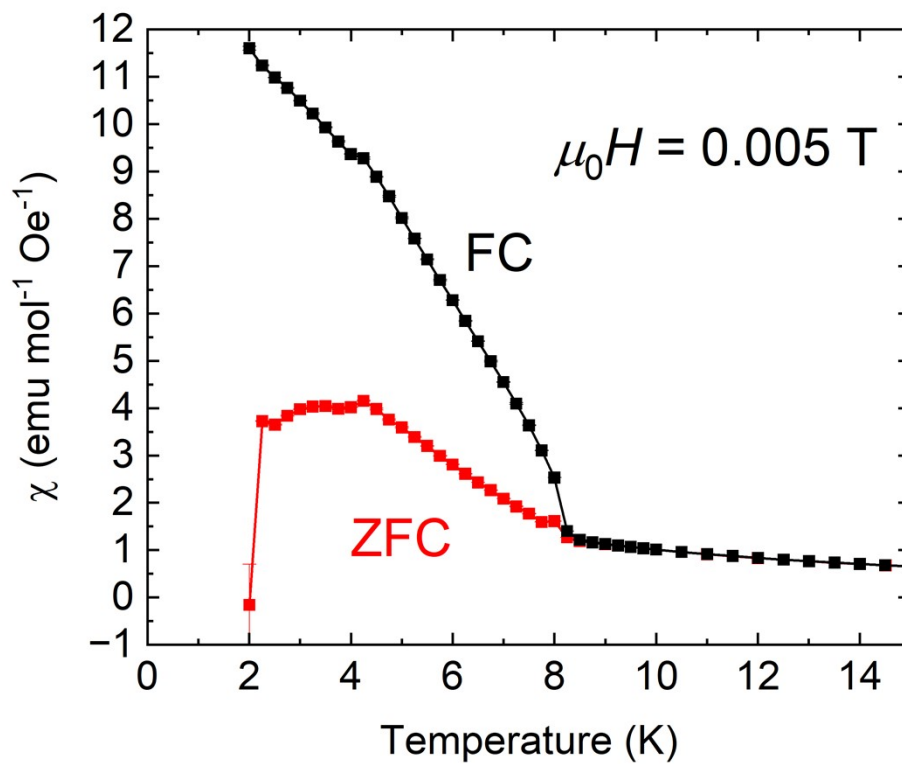

**Figure S4.** Zero-field-cooled (ZFC) and field-cooled (FC) magnetic susceptibility ( $\chi$ ) as a function of temperature collected at an applied field of  $\mu_0 H = 0.005$  T.

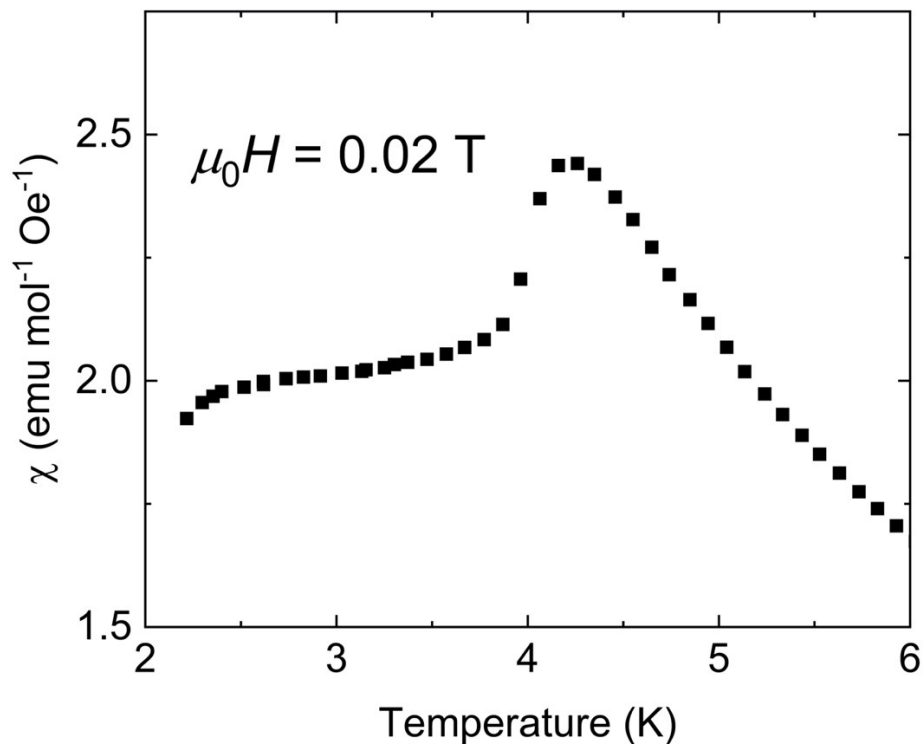

**Figure S5.** ZFC magnetic susceptibility ( $\chi$ ) as a function of temperature collected at an applied field of  $\mu_0 H = 0.02$  T.

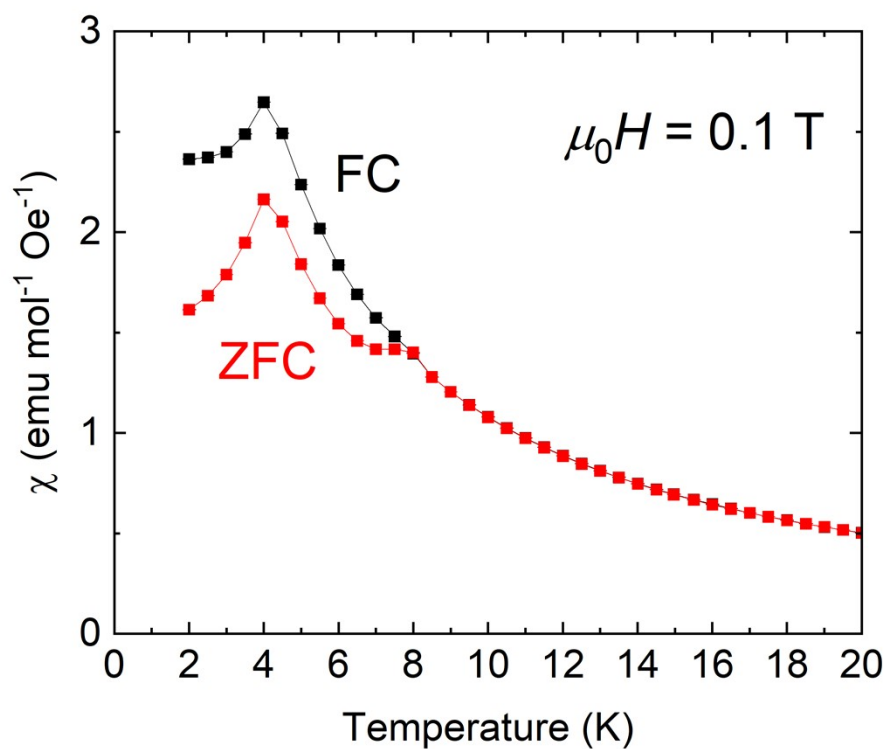

**Figure S6.** ZFC and FC magnetic susceptibility ( $\chi$ ) as a function of temperature collected at an applied field of  $\mu_0 H = 0.1$  T.

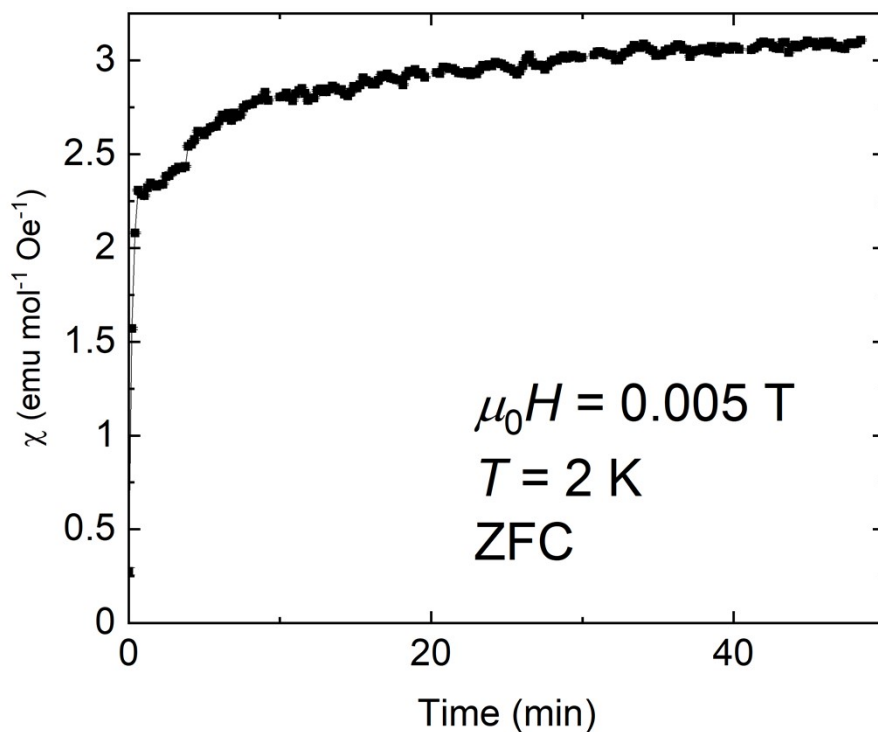

**Figure S7.** Magnetic susceptibility as a function of measurement time collected in an applied field of  $\mu_0 H = 0.005 \text{ T}$ .

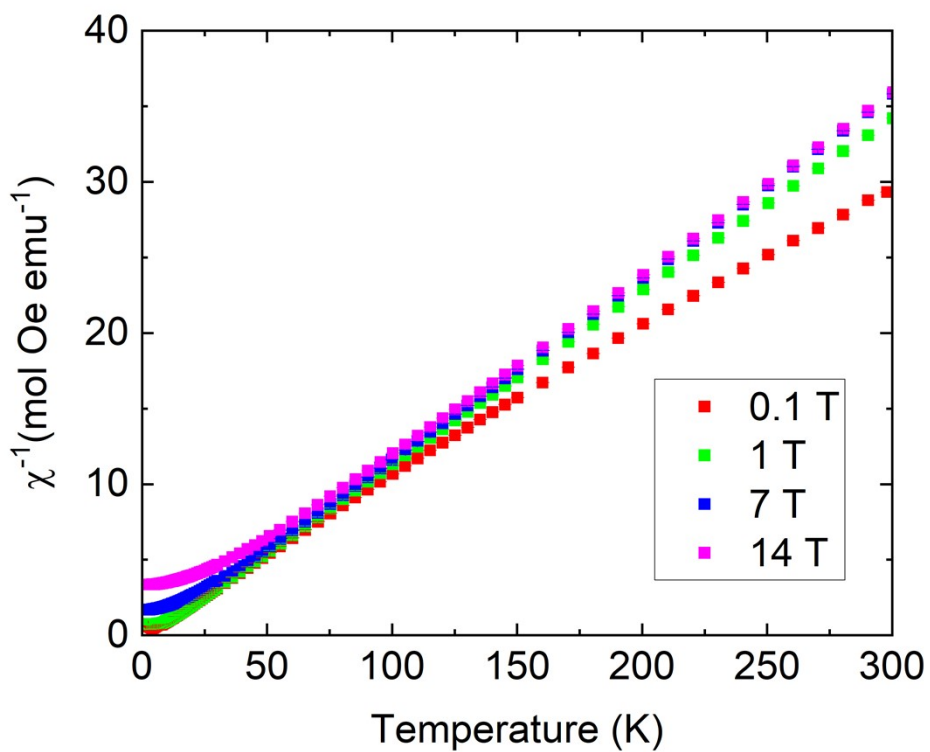

**Figure S8.** Inverse magnetic susceptibility ( $\chi^{-1}$ ) as a function of temperature at several applied fields.

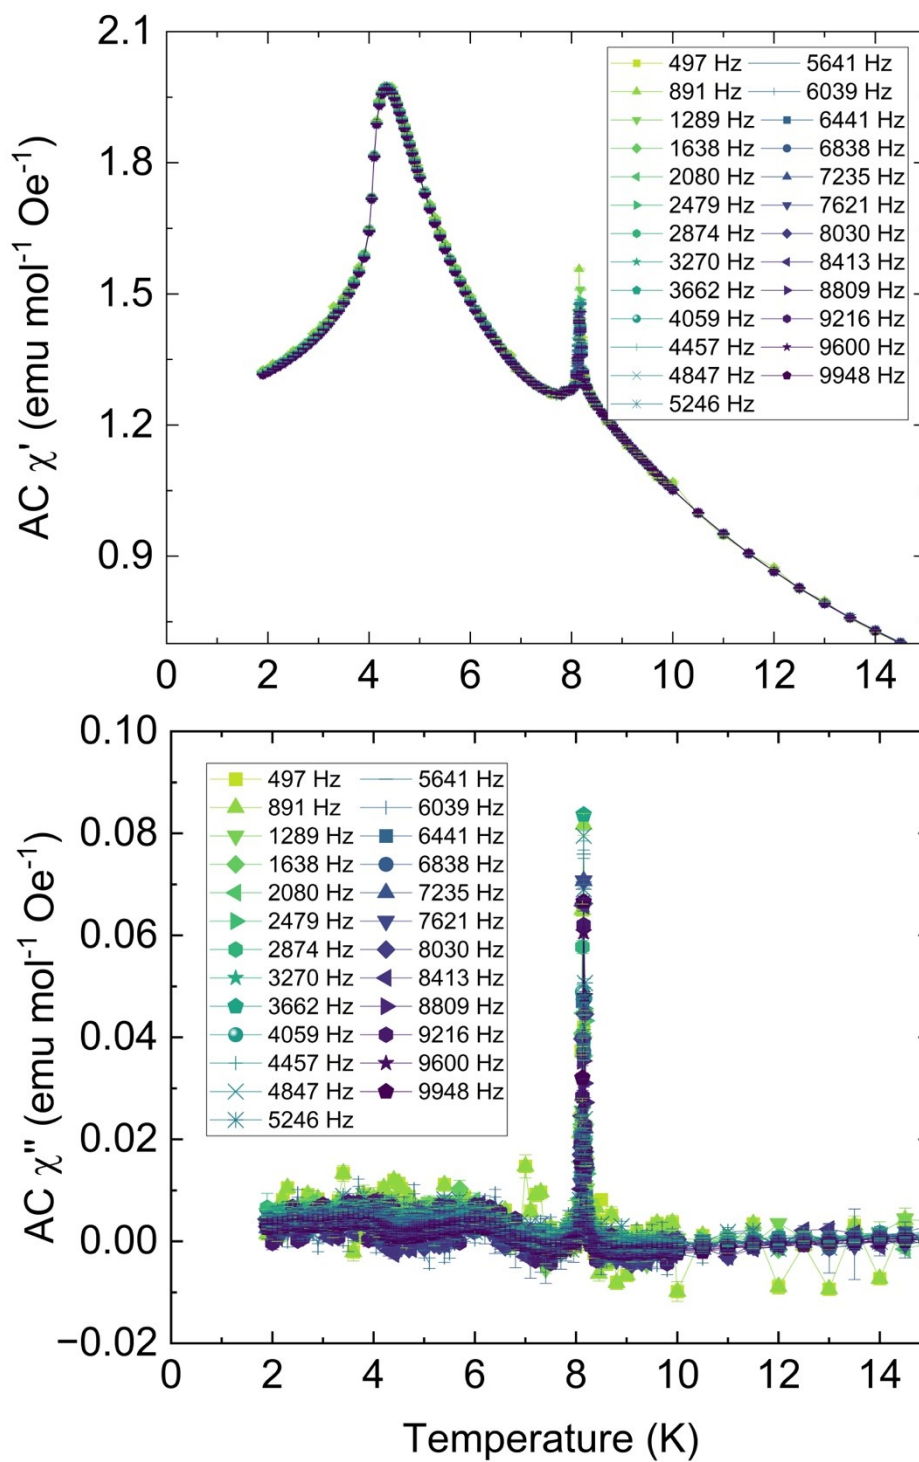

**Figure S9.** Frequency dependence of the real ( $\chi'$ ) and imaginary ( $\chi''$ ) parts of the AC susceptibility measured in zero applied field.



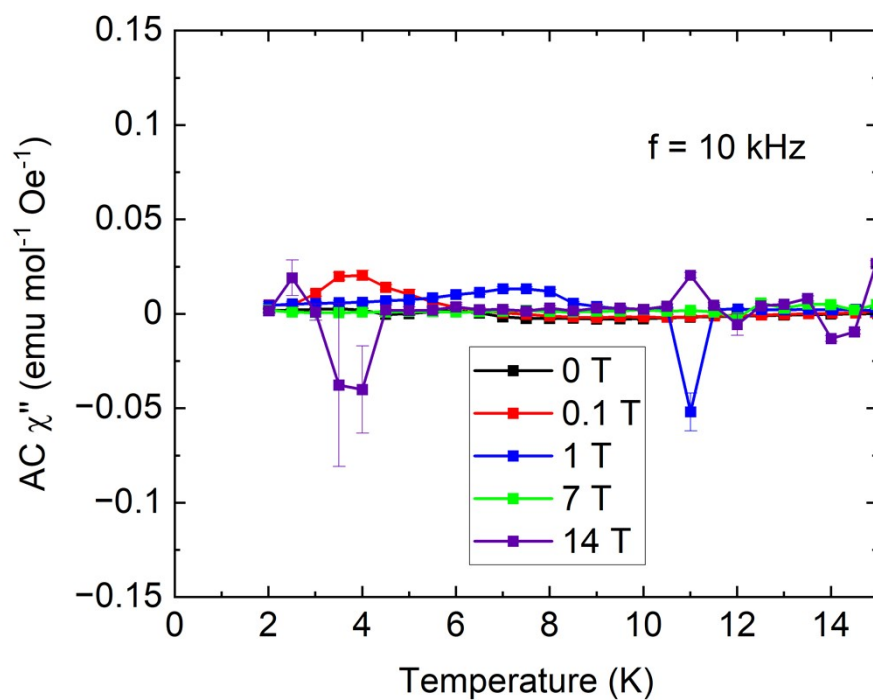

**Figure S10.** Temperature dependence of the imaginary part of the AC susceptibility ( $\chi''$ ) measured at several applied fields.

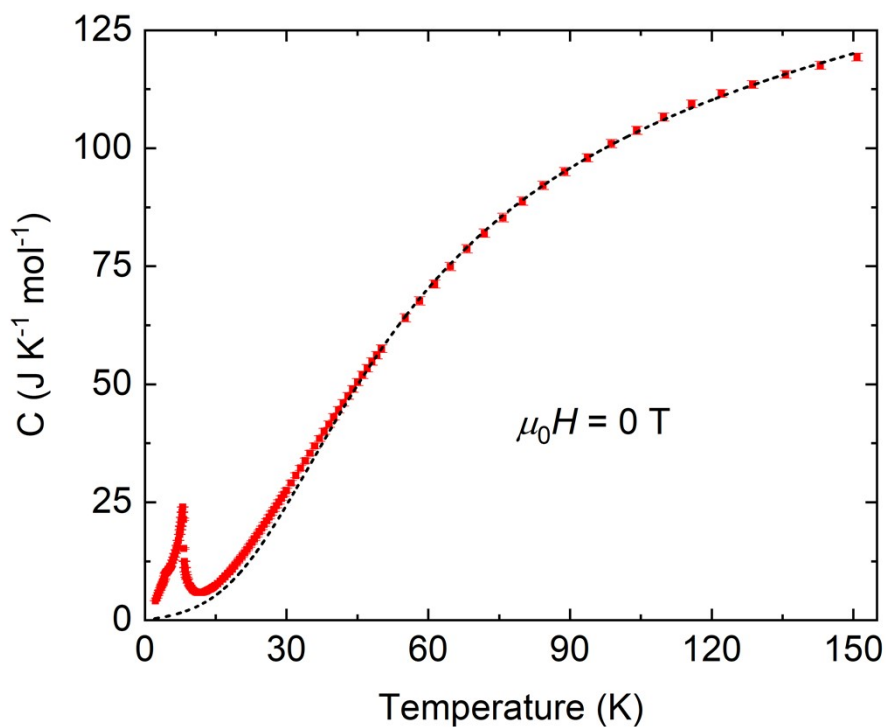

**Figure S11.** Molar heat capacity ( $C_p$ ) measured at  $\mu_0 H = 0$  T. The dashed line indicates the background ( $C_{bg}$ ) extrapolated to  $T = 0$  K; see the main text for details.

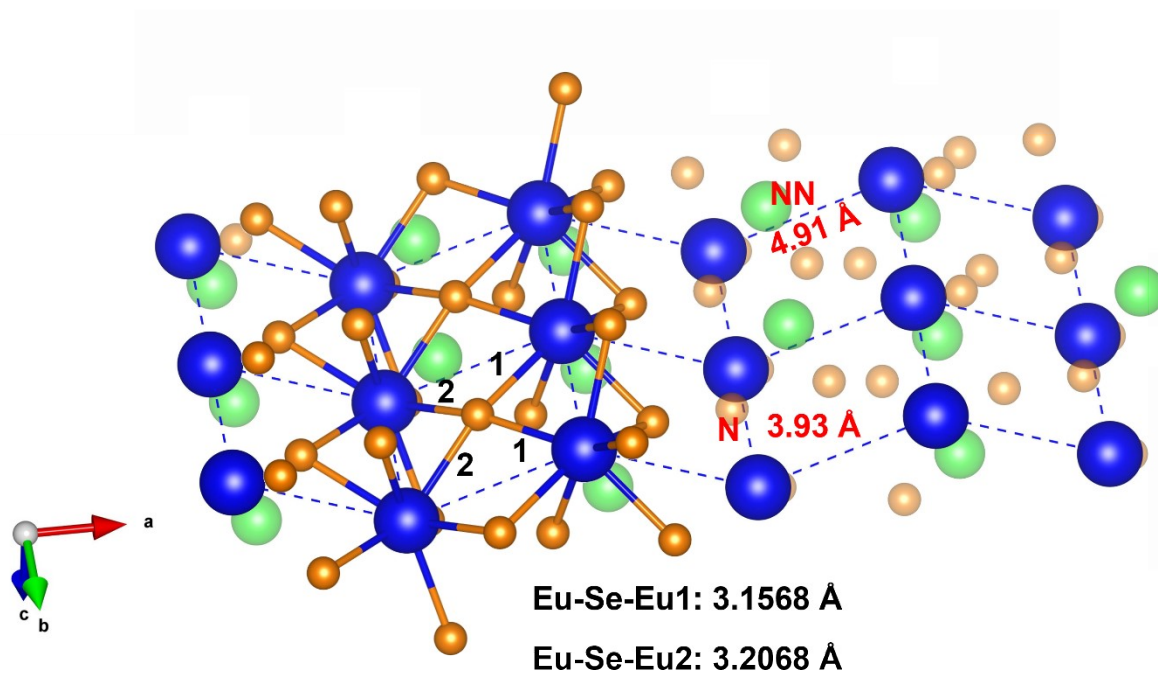

**Figure S12.** Structural view of the corrugated  $[\text{EuSe}_2\text{Se}_{2/2}\text{Se}_{4/4}]$  layer with Eu-Eu nearest-neighbor distances shown in each direction as dashed lines.
